# Supplementary material for: Cholangiocyte-Derived Exosomal Long Noncoding RNA PICALM-AU1 Promotes Pulmonary Endothelial Cell EndMT in Hepatopulmonary Syndrome
Source: Research Square preprint supplement (doi:10.21203/rs.3.rs-1054771/v1), 2021-11-15
Supplement: Supplementary file 1 [file 2167d61d3533744e30496e86.xlsx]

## Sheet: Primer
Table S1. Primers for this study
Gene name	Assay	Primer direction	Primer sequence
PICALM-AU1	cloning, sequencing	Forward	5'-AGGGACAGGCAGCTGCAGGAA-3'
		Reverse	5'-GACGAAGCTTCTGATCCCAA-3'
PICALM-AU1	q-RT PCR	Forward	5'-TGACGCTCCCTGCCAACAGGT-3'
		Reverse	5'-GATAGCAGTTGGAGAGATTTCAG-3'
miR144-3p	q-RT PCR	Forward	5'-TACAGTATAGATGATGTACT-3'
miR144-5p	q-RT PCR	Forward	5'-GGATATCA TCATATACTG TAAGT-3'
pGl3-LUC-PICALM-AU1 WT	cloning	Forward	5'-CGTGACGCTCCCTGCCAACA-3'
		Reverse	5'-AGATAGCAGTTGGAGAGATTTC-3'
pGl3-LUC-PICALM-AU1 MUT	cloning	Forward	5'-GCGAGTTTTTGGAGAAGCGTTTTTTAGGA-3'
		Reverse	5'-TCCTAAAAAACGCTTCTCCAAAAACTCGC-3'
VE-cadherin	q-RT PCR	Forward	5'-CATTGAGACAGACCCCGACC-3'
		Reverse	5'-CTGTCACTGGTCTTGCGGAT-3'
Vimentin	q-RT PCR	Forward	5'-TGAGATCGCCACCTACAGGA-3'
		Reverse	5'-AAGGTCATCGTGGTGCTGAG-3'
SLUG	q-RT PCR	Forward	5'-CCTCACCTCAGGAGCGTACA-3'
		Reverse	5'-CTGAAAGCTTGGGCTGGAGT-3'
Snail	q-RT PCR	Forward	5'-GAAAGGCCTTCTCCAGGCCC-3'
		Reverse	5'-GTATCTCTTCACATCCGAGTGGG-3'
TWIST	q-RT PCR	Forward	5'-AGTCGCTGAACGAGGCATTT-3'
		Reverse	5'-GCAGCTTGCCATCTTGGAGT-3'
ZO-1	q-RT PCR	Forward	5'-CCGCGGCATTTTTAACAGCA-3'
		Reverse	5'-TCACAGTGTGGCAAGCGTAG-3'
GAPDH	q-RT PCR	Forward	5'-CCAAGGTCATCCATGACAACTT-3'
		Reverse	5'-AGGGGCCATCCACAGTCTT-3'
