# Supplementary material for: Cholangiocyte-Derived Exosomal Long Noncoding RNA PICALM-AU1 Promotes Pulmonary Endothelial Cell EndMT in Hepatopulmonary Syndrome
Source: Research Square preprint supplement (doi:10.21203/rs.3.rs-1054771/v1), 2021-11-15
Supplement: Supplementary file 2 [file 7b83cf5bd11a2353540a7534.xlsx]

## Sheet: Sheet1
Table S2. Antibodies information
Protein name	Assay	Manufacturer	NO.	Aditional information
VE-cadherin	Western blot, IHC, IF	abcam	ab33168	Western blot, 1:2000; IHC and IF, 1:200
Vimentin	Western blot, IHC	Cell Signaling Technology	5741	Western blot, 1:5000; IHC and IF, 1:200
VWF	Western blot, IHC	abcam	ab6994	Western blot, 1:5000; IHC and IF, 1:200
CK19	Western blot, IF	abcam	ab7754	IHC and IF, 1:250
CD63	Western blot, IF	abcam	ab217345	Western blot, 1:5000; IF, 1:200
CD81	Western blot	abcam	ab243887	Western blot, 1:2000
ZO-1	Western blot, IF	abcam	ab96587	Western blot, 1:2000; IF, 1:200
ZEB1	Western blot, IF	abcam	ab203829	Western blot, 1:2000; IF, 1:100
TWIST	Western blot	abcam	ab50581	Western blot, 1:2000
Snail	Western blot	abcam	ab229701	Western blot, 1:2000
SLUG	Western blot	Cell Signaling Technology	9585	Western blot, 1:2000
N-cadherin	Western blot	Cell Signaling Technology	14215	Western blot, 1:2000
β-actin	Western blot	Cell Signaling Technology	3700s	Western blot, 1:10000
